# Supplementary material
Source: PubMed Central journal article supplement (PMC2755888)
Supplement: supp_M109.016923_Suppdata.pdf [file supp_M109.016923_Suppdata.pdf]

**Supplementary Figure 1. Western blot analysis of HD53Q aggregation when incubated in the presence and absence of antibodies.** MW8 was used to detect aggregated HD53Q that remained in the well. At 0 h, no aggregates were observed. After 8 h of incubation, aggregates were observed in control HD53Q alone. Only MW7 and 3B5H10 completely prevented HD53Q aggregation.

**Supplementary Movie 1. Time lapse *in situ* AFM images demonstrating the stability of HD53Q fibrils under experimental conditions.** Samples of HD53Q were incubated for 6–8 h after removal of the GST moiety to form a large population of fibrils. These fibrils were deposited on mica and imaged using *in situ* AFM, which allows for the tracking of the fate of individual fibrils as a function of time. Extra neat buffer was injected into the fluid cell, and the HD53Q fibrils remained stable under continuous imaging up to 376 min.

**Supplementary Movie 2. Time lapse *in situ* AFM images demonstrating the disaggregation of HD53Q fibrils treated with 3B5H10.** Samples of HD53Q were incubated for 6–8 h after removal of the GST moiety to form a large population of fibrils. These fibrils were deposited on mica and imaged using *in situ* AFM, which allows for the tracking of the fate of individual fibrils as a function of time. These fibrils were treated with 3B5H10, and the HD53Q fibrils appear to disaggregate and shorten over the time course of the experiment.
